# Supplementary material
Source: PubMed Central journal article supplement (PMC10362381)
Supplement: mmc1.pdf [file mmc1.pdf]

## Supplemental Information

### **A high-fidelity RNA-targeting Cas13 restores paternal *Ube3a* expression and improves motor functions in Angelman syndrome mice**

**Jinhui Li, Zhixin Shen, Yajing Liu, Zixiang Yan, Yuanhua Liu, Xiang Lin, Junjie Tang, Ruimin Lv, Guannan Geng, Zhi-Qi Xiong, Changyang Zhou, and Hui Yang**

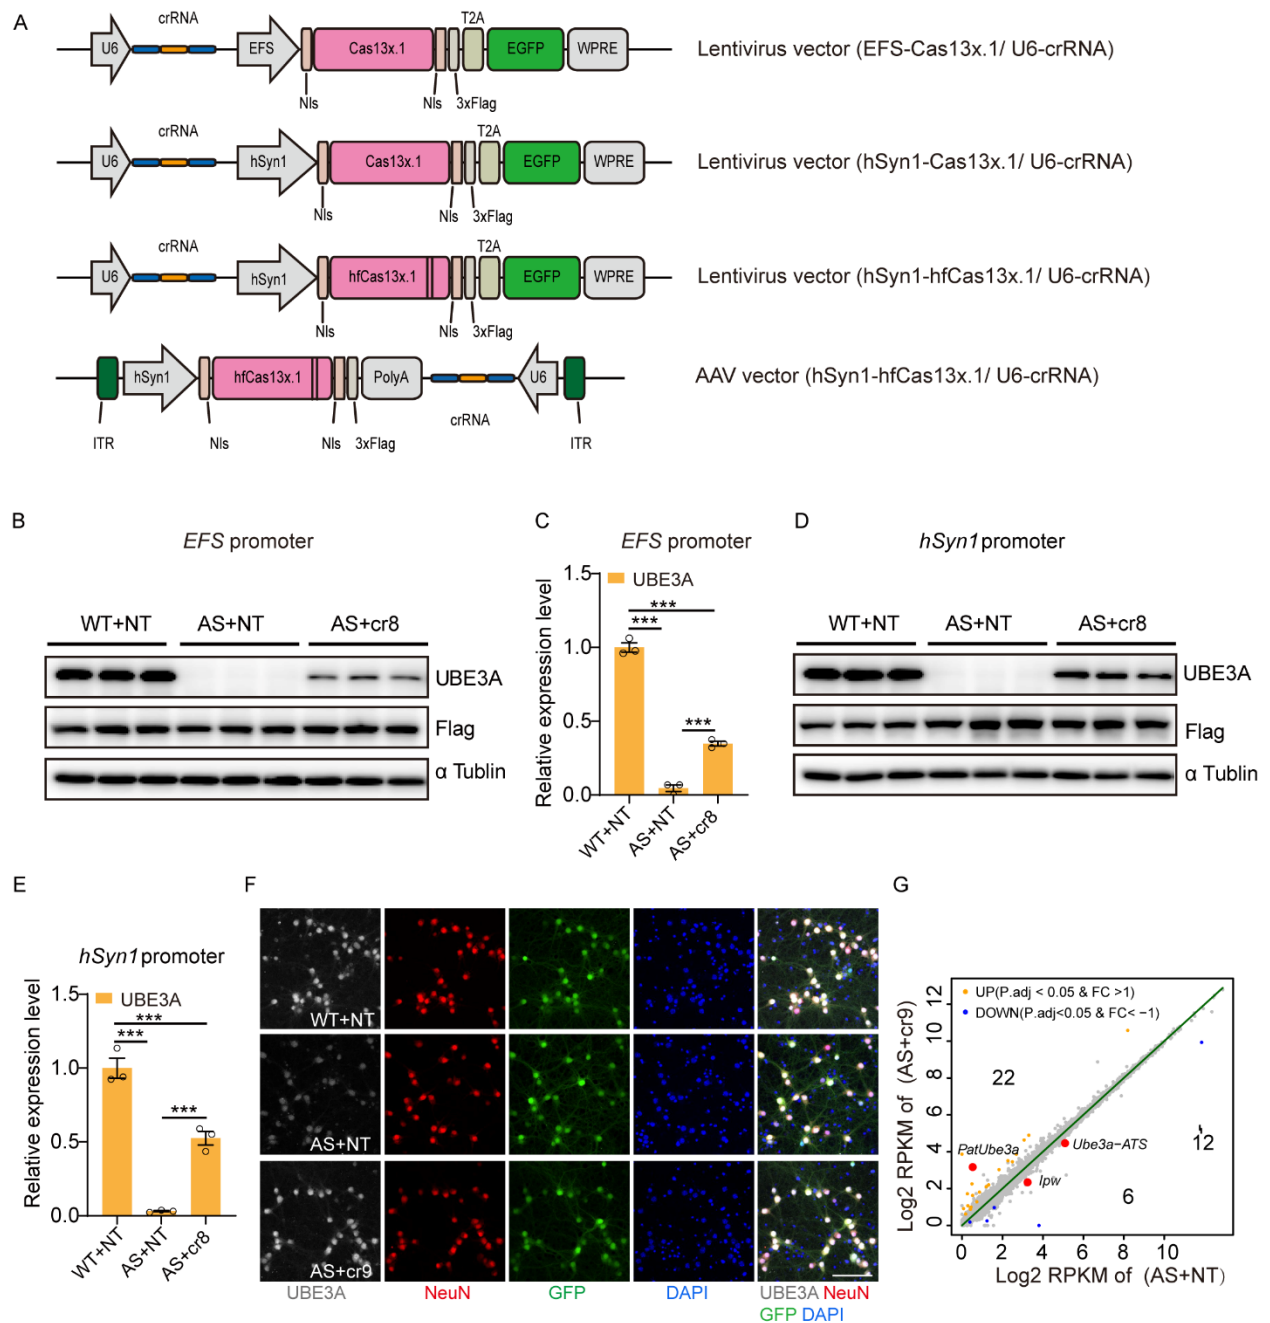

**Fig. S1. Development of the Cas13x.1/crRNA system.** **A**, Map of Cas13x.1-crRNA expression cassette in lentivirus or adeno-associated virus (AAV) backbone (not to scale). *U6* promoter, elongation factor 1 alpha short promoter (*EFS*), human synapsin-1 promoter (*hSyn1*), nuclear localization sequence (NLS), 3×Flag tag, T2A self-cleaving peptide, enhanced green fluorescent

protein (EGFP), woodchuck hepatitis virus posttranscriptional regulatory element (WPRE), inverted terminal repeat (ITR), SV40 polyadenylation sequence element (SV40 PolyA), CRISPR RNA (crRNA). **B-E**, Western blot analysis (**B, D**) and band density quantification (**C, E**) of protein expression in WT or primary neurons of AS mice infected with *EFS-Cas13x.1/U6-crRNA* (**B, C**) or *hSyn1-Cas13x.1/U6-crRNA* (**D, E**) (n = 3 for all groups). **F**, Immunofluorescence staining for indicated proteins in lentivirus-infected primary neurons of WT or AS mice. Primary neurons of WT or AS mice were infected with lentivirus containing *hSyn1-hfCas13x.1/U6-NT* or *hSyn1-hfCas13x.1/U6-cr9*, scale bar, 100  $\mu$ m. **G**, Differential expression analysis of total mRNA between *hSyn1-hfCas13x.1/U6-cr9* and *hSyn1-hfCas13x.1/U6-NT* infected primary neurons of AS mice (n = 3 for all groups), paternal *Ube3a* (*patUbe3a*) is *Ube3a* mRNA with intact sequence expressed from paternal allele, but not *Ube3a* KO allele. Statistical significance was assessed by one-way ANOVA followed Tukey's multiple comparison test. \*P < 0.05; \*\*P < 0.01; \*\*\*P < 0.001.

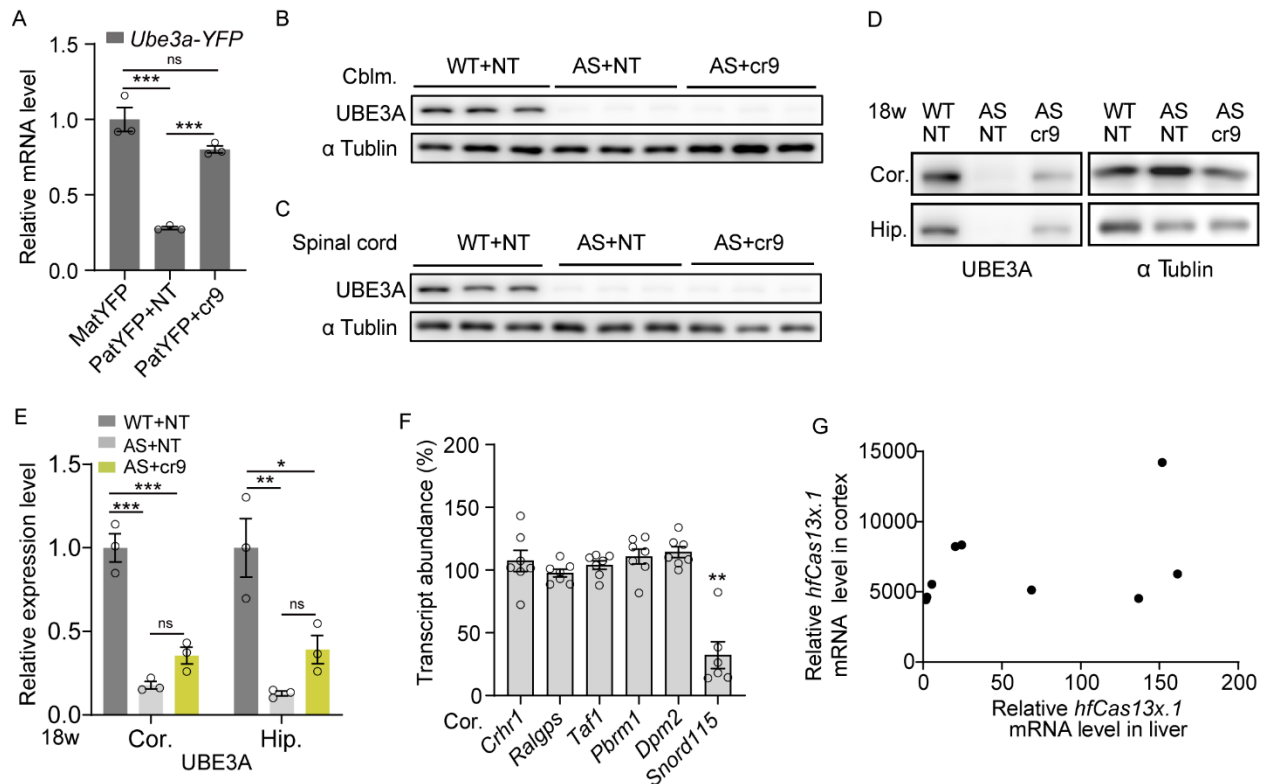

**Fig. S2. In vivo detection of *Ube3a* expression and unsilencing efficiency.** **A**, RT-qPCR analysis of mRNA expression of *Ube3a-YFP* in *Ube3a<sup>matYFP/p-</sup>* or *Ube3a<sup>m-/patYFP</sup>* mouse primary neurons. *Ube3a<sup>m-/patYFP</sup>* primary neurons were infected with AAV containing *hSyn1-hfCas13x.1/U6-NT* or *hSyn1-hfCas13x.1/U6-cr9*. *Ube3a<sup>matYFP/p-</sup>* primary neurons were infected with AAV containing *hSyn1-hfCas13x.1/U6-NT* as a control. **B**, **C**, Western blot analysis of protein expression in the cerebellum (Cblm.) and spinal cord of WT and AS mice at 4 weeks (n = 3 for all groups). **D**, **E**, Western blot (**D**) and quantification (**E**) of protein expression in the cerebral cortex (cor.) and hippocampus (hip.) of WT and AS mice with indicated treatment at 18 weeks (n = 3 for all groups). **F**, mRNA levels of *Snord115* target genes in cortex of AS mice treated with *hSyn1-hfCas13x.1/U6-cr9* at 4 weeks relative to that in AS mice treated with *hSyn1-hfCas13x.1/U6-NT* (n = 7 for all groups). **G**, mRNA levels of *hfCas13x.1* in cortex or liver at 18 weeks after treatment (n=9). Statistical significance was assessed by one-way ANOVA followed with

Tukey's multiple comparison test. \*P < 0.05; \*\*P < 0.01; \*\*\*P < 0.001.

A

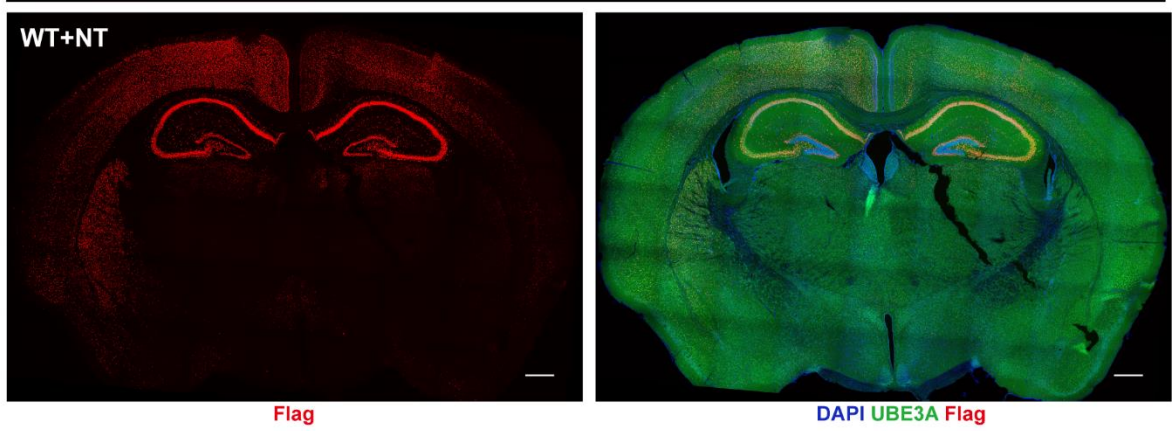

B

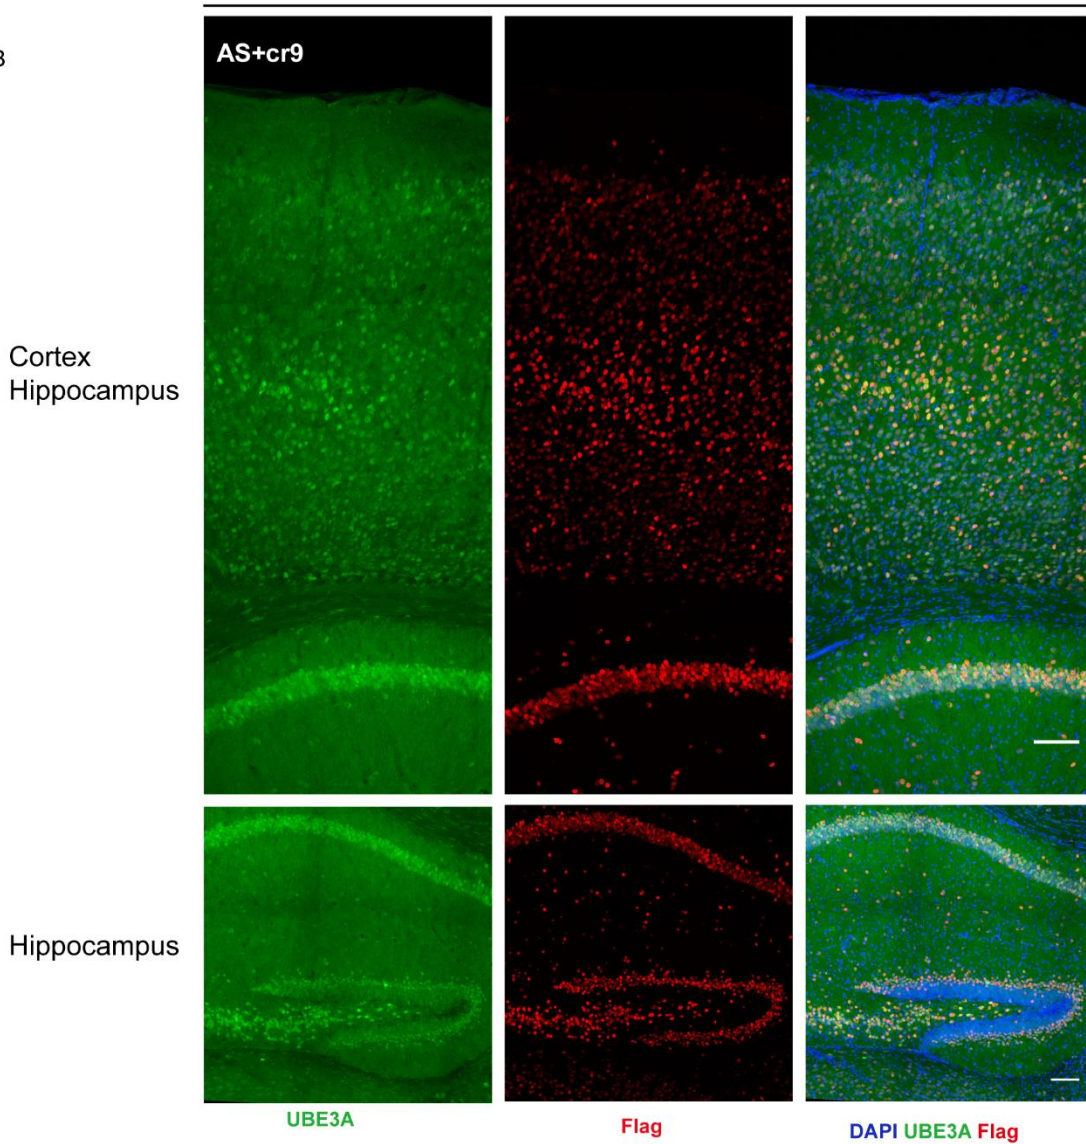

Fig. S3. The expression distribution of hfCax.1-Flag across cortex and hippocampus. A, The

coronal image of immunofluorescence staining for indicated proteins in WT mouse at 4 weeks after I.C.V. injection of AAV-PHP.eb carrying *hSyn1*-hfCas13x.1/*U6*-NT, scale bar, 500  $\mu$ m. **B**, The enlarged images (for Fig. 2G) of immunofluorescence staining for indicated proteins in cortex and hippocampus of AS mouse at 4 weeks after I.C.V. injection of AAV-PHP.eb carrying *hSyn1*-hfCas13x.1/*U6*-cr9, scale bar, 100  $\mu$ m.

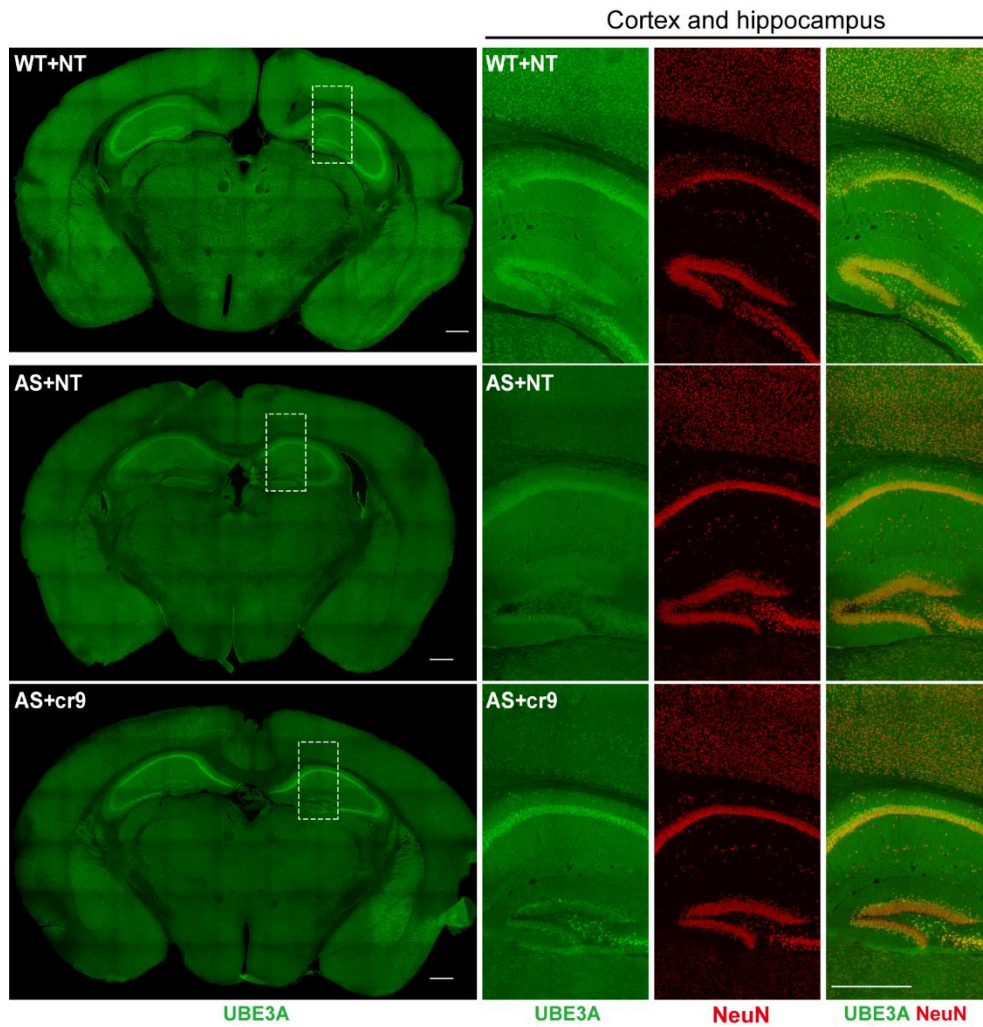

**Fig. S4. AAV delivery of the CRISPR-hfCas13x system restores expression of paternal UBE3A in neurons.** Representative images of immunofluorescence staining for indicated proteins in cortex and hippocampus of WT or AS mouse at 4 weeks after I.C.V. injection of AAV-PHP.eb carrying *hSyn1*-hfCas13x.1/*U6*-NT or *hSyn1*-hfCas13x.1/*U6*-cr9, scale bar, 500  $\mu$ m.



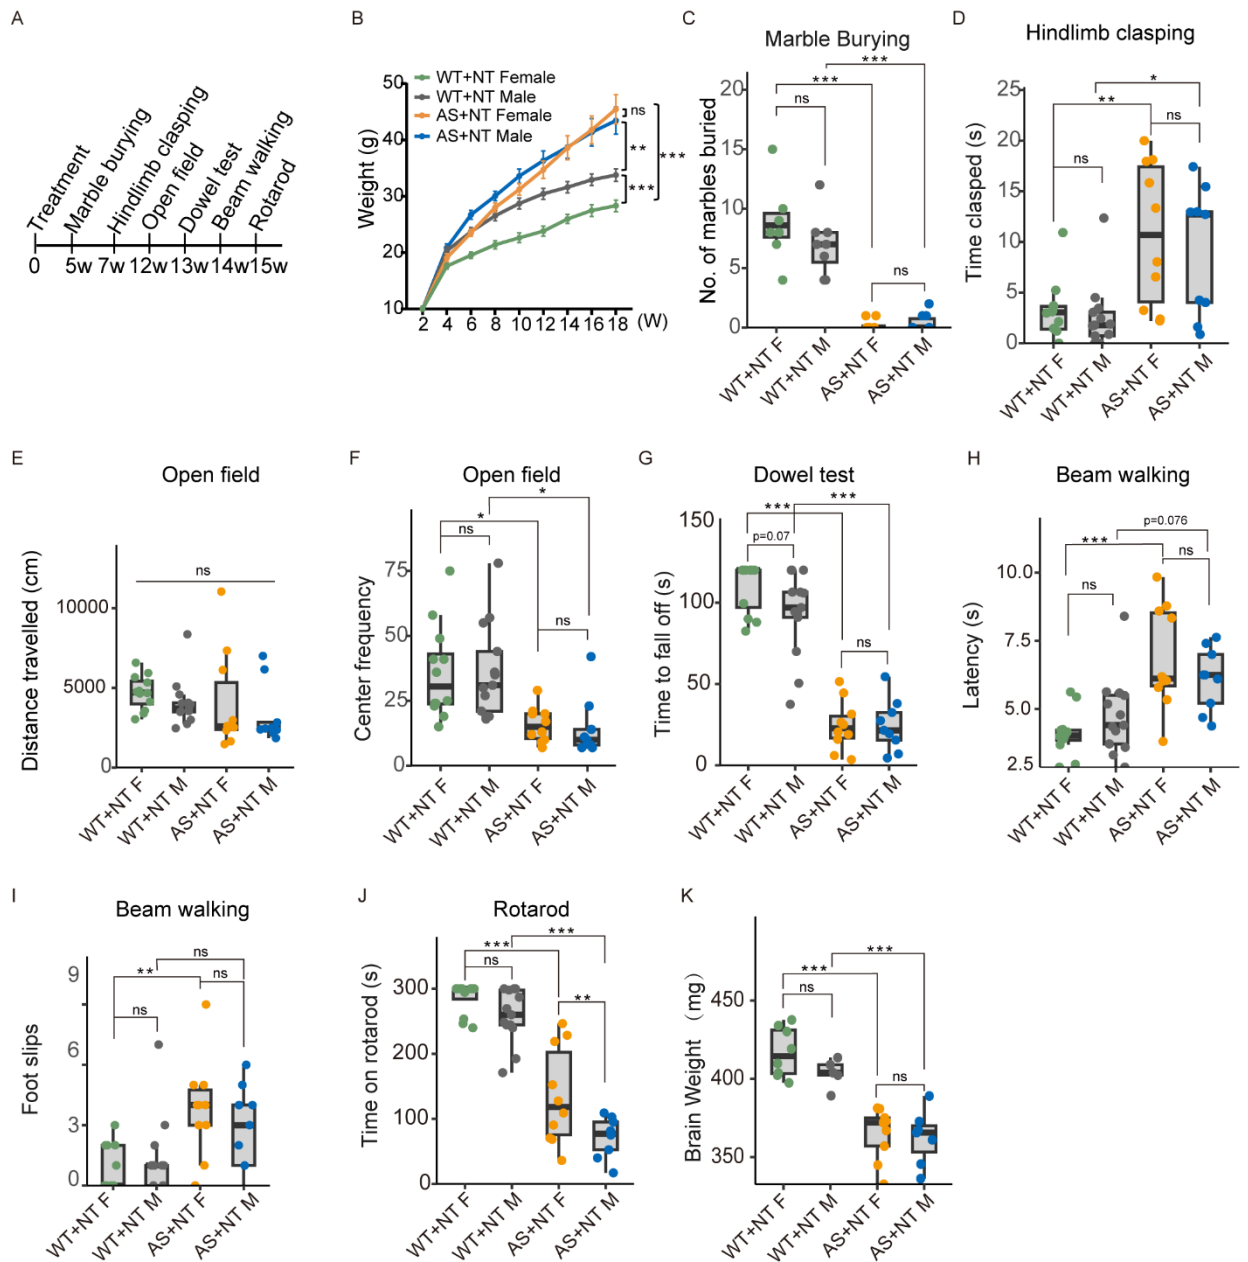

**Fig. S5. The behavioral analysis in WT and AS mice injected with hfCas13x.1/NT. A,**

Timeline of assays performed on WT and AS mice injected I.C.V. bilaterally at P0 with 2  $\mu$ L of  $5 \times 10^{13}$  vg/mL AAV-PHP.eb containing *hSyn1*-hfCas13x.1/*U6*-NT. **B,** Body weight of male and female mice was measured biweekly over 18 weeks (n = 12 for WT+NT Female; n = 10 for AS+NT Female; n = 13 for WT+NT Male; n = 9 for AS+NT Male). **C,** Marble burying test data in 5-week-old mice (n = 8 for WT+NT Female; n = 10 for AS+NT Female; n = 8 for WT+NT Male; n = 10

for AS+NT Male). **D**, Hindlimb clasping assays in 7-week-old mice. **E, F**, Open field tests in 12-week-old mice, the distances traveled (**E**) and Center frequency data (**F**) are shown. **G**, Dowel tests in 13-week-old mice. **H, I**, Beam walking assays in 14-week-old mice, time to traverse the beam (**H**) and the number of foot slips (**I**) are shown. **J**, Accelerating rotarod test in 15-week-old mice. (**D-J**, n = 12 for WT+NT Female; n = 10 for AS+NT Female; n = 13 for WT+NT Male; n = 9 for AS+NT Male). **K**, Brain weight measured at 18 weeks of age (n = 8 for WT+NT Female; n = 9 for AS+NT Female; n = 5 for WT+NT Male; n = 7 for AS+NT Male). Statistical significance was assessed by one-way ANOVA followed by holm-sidak comparison test. \*P < 0.05; \*\*P < 0.01; \*\*\*P < 0.001.

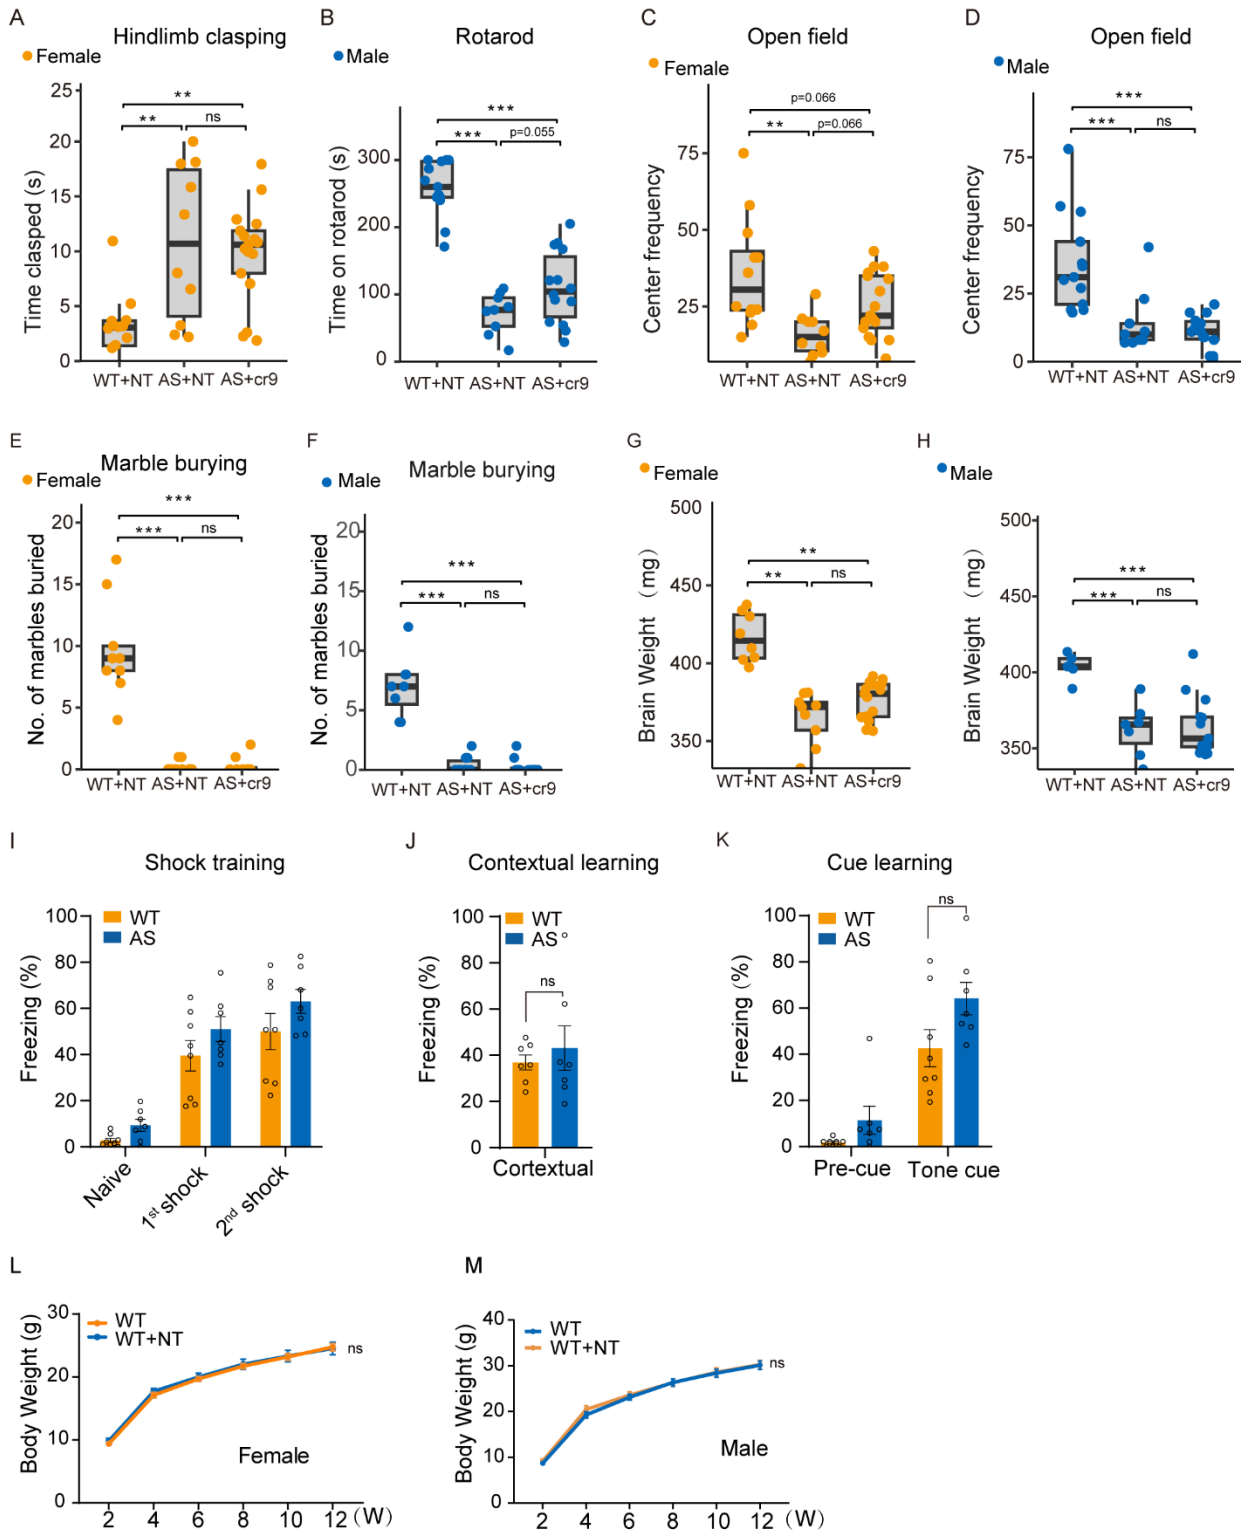

**Fig. S6. Additional behavioral tests.** **A**, Hindlimb clasping assays in 7-week-old female mice. **B**, Accelerating rotarod test data in 15-week-old male mice. **C**, **D**, The center frequency of open field

test in 12-week-old female (**C**) or male (**D**) mice. (**A,C**, n = 12 for WT+NT; n = 10 for AS+NT; n = 17 for AS+cr9). (**B,D**, n = 13 for WT+NT; n = 9 for AS+NT; n = 14 for AS+cr9). **E, F**, Marble burying test in 5-week-old female mice (**E**) (n = 8 for WT+NT; n = 10 for AS+NT; n = 10 for AS+cr9) and male mice (**F**) (n = 8 for WT+NT; n = 10 for AS+NT; n = 12 for AS+cr9). **G, H**, Brain weight measured at 18 weeks of age in female mice (**G**) (n = 8 for WT+NT; n = 9 for AS+NT; n = 15 for AS+cr9) and male mice (**H**) (n = 5 for WT+NT; n = 7 for AS+NT; n = 13 for AS+cr9). (**I-K**), Fear conditioning test in 10-week-old mice. Freezing percent of shock training (**I**), contextual learning (**J**) and cue learning (**K**) were measured during the fear conditioning assay (n = 8 for WT and n = 7 for AS). **L, M**, The body weight of WT and WT+NT. Body weight of female mice was measured biweekly over 12 weeks (**L**) (n = 14 for WT; n = 15 for WT+NT). Body weight of male mice was measured biweekly over 12 weeks (**M**) (n = 11 for WT; n = 13 for WT+NT). Statistical significance was assessed by one-way ANOVA followed by holm-sidak comparison test. \*P < 0.05; \*\*P < 0.01; \*\*\*P < 0.001.

**Table S1. CrRNA sequence and the knock-down efficiency.**

| crRNA | Sequence                                 | Knock-down efficiency of <i>Ube3a-ATS</i> in N2a | Number of predicted target sites on pre-mRNA ( <i>Ube3a-ATS</i> ) with 0-2 base pair mismatches |                   |                   |       |
|-------|------------------------------------------|--------------------------------------------------|-------------------------------------------------------------------------------------------------|-------------------|-------------------|-------|
|       |                                          |                                                  | with 0 mismatches                                                                               | with 1 mismatches | with 2 mismatches | Total |
| cr1   | GCUCUGUCCCUUGG<br>GCCUUCUGUGUCAU<br>GG   | 36.10%                                           | 1                                                                                               | 0                 | 0                 | 1     |
| cr2   | CACAU AAGAAUCCA<br>AGUAUGAGA UCCCA<br>AC | 36.80%                                           | 1                                                                                               | 0                 | 0                 | 1     |
| cr3   | AGGCCAGCCUUGUU<br>GGAUAUCAUAGAA<br>UCC   | 47.60%                                           | 1                                                                                               | 2                 | 74                | 77    |
| cr4   | GAUCCA UUUGUGUU<br>AAGCUGUAAUGGG<br>UUG  | 36.90%                                           | 1                                                                                               | 0                 | 1                 | 2     |
| cr5   | UCUCCACAUGGGGUG<br>AAU UCCCUGUGGGU<br>UG | 29.80%                                           | 1                                                                                               | 0                 | 0                 | 1     |
| cr6   | CCGAAUGUAUAGGC<br>CAUUGUUUCCUCAG<br>UG   | 63.90%                                           | 1                                                                                               | 0                 | 0                 | 1     |
| cr7   | CUGCUGGAUCAAAU<br>UUGGGCCUUGGUGU<br>CA   | 46.70%                                           | 1                                                                                               | 0                 | 0                 | 1     |
| cr8   | AUUGCAUGACAGCA<br>CUCACUGUGAAAUG<br>UG   | 74.80%                                           | 1                                                                                               | 1                 | 2                 | 4     |
| cr9   | GAUAGGUAUUUCG<br>AGUGUGAUUAAAG<br>UAAC   | 81.40%                                           | 1                                                                                               | 95                | 23                | 119   |

**Table S2. Differentially expressed genes****Table S3. Predicted off-target sites****Table S4. The behavioural test data**

**Table S5. RT-qPCR primer list**

| Primer name         | Primer sequence           | Species |
|---------------------|---------------------------|---------|
| Ube3a-ATS Q1-F 5-3' | CCAATGACTCATGATTGTCCTG    | mouse   |
| Ube3a-ATS Q1-R 5-3' | GTGATGGCCTTCAACAATCTC     | mouse   |
| Ube3a-ATS Q3-F 5-3' | GGCACCCCTTGTTTGAAACTT     | mouse   |
| Ube3a-ATS Q3-R 5-3' | GTCATGACCCTGTCCTTTC       | mouse   |
| Ube3a Q3-F 5-3'     | CAAAGGTGCATCTAACAACCTCA   | mouse   |
| Ube3a Q3-R 5-3'     | GGGAATAATCCTCACTCTCTC     | mouse   |
| Snrpn Q1-F 5-3'     | TGTGATTGTGATGAGTTCAGGAAGA | mouse   |
| Snrpn Q1-R 5-3'     | ACCAGACCCAAAACCCGTTT      | mouse   |
| Snord115 Q1-F 5-3'  | CCATGTGACCATTCCTACTCTG    | mouse   |
| Snord115 Q1-R 5-3'  | AGAATTCGGCTACATCTACTTGG   | mouse   |
| Snord116 Q1-F 5-3'  | ATTGGTCCCACTGTAATCGG      | mouse   |
| Snord116 Q1-R 5-3'  | GTTTCGATGGAGACTCAGTTGG    | mouse   |
| Gapdh Q1-F 5-3'     | CTCCCACTCTCCACCTTCG       | mouse   |
| Gapdh Q1-R 5-3'     | TAGGGCCTCTCTTGCTCAGT      | mouse   |
| Ipw-Q3 F 5-3'       | CTGCTGGTAGAAGAAATGGCACC   | mouse   |
| Ipw-Q3 R 5-3'       | CATGGGCCATGAGTGACATCC     | mouse   |
